# Supplementary material for: Integrative Omic Analysis Reveals the Dynamic Change in Phenylpropanoid Metabolism in Morus alba under Different Stress
Source: MDPI journal article supplement (doi:10.3390/plants12183265), 2023-09-14
Supplement: s1 [file s1]

Table S1 Primers used in qRT-PCR

| Primer    | Sequence             |
|-----------|----------------------|
| COMT-F    | GTCGACCGTGCTGTCTATGT |
| COMT-R    | GCAATTGAGCACAGAGTGGC |
| β-actin-F | AGGGGAAGCTGGCTTATGTT |
| β-actin-R | CGGGCAGCTCATAGTTCTTC |

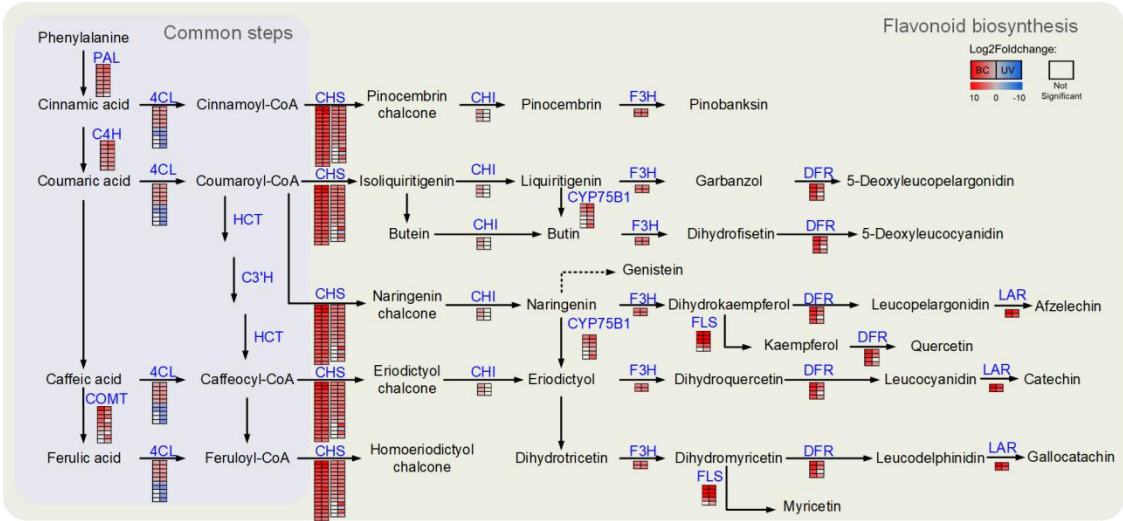

Figure S1 DEGs in flavonoid biosynthesis. Data was extracted from published transcriptome study of *M. alba* leaves [20]. Each line of squares represented an RNA. Filled color represented Log2Foldchange of RNA. Left column represented Log2Foldchange in BC group, and right column represented Log2Foldchange in UVB group.
